# Supplementary material for: Genetic support of causal association between lipid and glucose metabolism and stress urinary incontinence in women: a bidirectional Mendelian randomization and multivariable-adjusted study
Source: Front Endocrinol (Lausanne). 2024 Sep 16;15:1394252. doi: 10.3389/fendo.2024.1394252 (PMC11439682; doi:10.3389/fendo.2024.1394252)
Supplement: Supplementary file 1 [file Table1.xlsx]

## Sheet: Supplementary Table 1
Table S1: F-statistics of the instrumental SNPs of lipid and glucose metabolism
Exposure	Sample size	α	R2xz	PMID(R2xz)	Power	F-statistic
TC	62166	0.05	10.02	24097068	0.06	6923.69
LDL	58381	0.05	9.86	24097068	1	6387.03
HDL	60812	0.05	10.62	24097068	1	7226.59
TG	60027	0.05	9.63	24097068	1	7133.32
FG	19745	0.05	2.08	34059833	0.07	420.42
FI	38238	0.05	2.54	36800955	0.08	997.56

## Sheet: Supplementary Table 2
Table S2: Plink clumping using R2<0.1, forward mendelian randomization results for the causal effect of lipid and glucose metabolism on SUI in female
Forward Mendelian randomization analysis
P<5E-8, R2<0.1						P<5E-10, R2<0.1
Exposures	Instrumental SNPs	Methods	OR	95%CI	P	Exposures	Instrumental SNPs	Methods	OR	95%CI	P
Total cholesterol	151	Weighted median	1.13122	1.0328,1.239	0.00790801	Total cholesterol	99	Weighted median	1.13418	1.034,1.244	0.00780949
		IVW	1.11719	1.0537,1.1845	0.000205803			IVW	1.13551	1.074,1.201	8.99993e-06
		MR-Egger	1.16251	1.0452,1.293	0.00552888			MR-Egger	1.16861	1.054,1.296	0.0031438
		(intercept)	-0.00385015	-0.0124,0.0047	0.380119			(intercept)	-0.00312631	-0.013,0.006	0.516806
		MBE	1.13313	1.0212,1.2573	0.0184791			MBE	1.14236	1.024,1.274	0.01701
		Contamination Mixture	1.16679	1.0771,1.2514	0.000514404			Contamination Mixture	1.15577	1.078,1.29	0.000306792
		RAPS	1.11912	1.0617,1.1796	2.78e-05			RAPS	1.1368	1.074,1.203	9.21e-06
Low-density lipoproteins	149	Weighted median	1.0953	1.0114,1.1862	0.0251672	Low-density lipoproteins	112	Weighted median	1.09614	1.01,1.189	0.0276644
		IVW	1.0876	1.0382,1.1393	0.000394662			IVW	1.09264	1.042,1.145	0.000223453
		MR-Egger	1.15183	1.0701,1.2399	0.000168434			MR-Egger	1.18119	1.095,1.274	1.60899e-05
		(intercept)	-0.00694457	-0.0139,0	0.050477			(intercept)	-0.0103227	-0.018,-0.002	0.0099634
		MBE	1.11301	1.0293,1.2035	0.0072713			MBE	1.1086	1.022,1.203	0.0133795
		Contamination Mixture	1.11671	1.0729,1.174	0.000244166			Contamination Mixture	1.12794	1.073,1.186	0.000182171
		RAPS	1.08851	1.0399,1.1394	0.000274			RAPS	1.09335	1.043,1.146	0.000226
High-density lipoproteins	133	Weighted median	1.16178	1.049,1.2866	0.00398857	High-density lipoproteins	87	Weighted median	1.16345	1.048,1.292	0.00454417
		IVW	1.0919	1.0311,1.1563	0.00264249			IVW	1.0893	1.016,1.168	0.0156385
		MR-Egger	1.09462	0.985,1.2165	0.0932537			MR-Egger	1.09746	0.959,1.255	0.175087
		(intercept)	-0.000236854	-0.0087,0.0082	0.95608			(intercept)	-0.000828541	-0.014,0.012	0.89868
		MBE	1.18934	1.0591,1.3356	0.00337881			MBE	1.17045	1.046,1.31	0.0060179
		Contamination Mixture	1.10889	1.0548,1.1775	0.000721229			Contamination Mixture	1.13129	1.034,1.25	0.00571834
		RAPS	1.0931	1.0318,1.158	0.00251			RAPS	1.09042	1.025,1.16	0.00632
Triglycerides	93	Weighted median	0.949288	0.8376,1.0759	0.415138	Triglycerides	56	Weighted median	0.947105	0.827,1.085	0.432225
		IVW	0.959337	0.88,1.0459	0.346191			IVW	0.982275	0.893,1.081	0.714259
		MR-Egger	1.007	0.8505,1.1922	0.935513			MR-Egger	0.987374	0.813,1.2	0.89818
		(intercept)	-0.00406167	-0.0162,0.0081	0.512073			(intercept)	-0.000484222	-0.016,0.015	0.9521
		MBE	0.922262	0.7425,1.1456	0.464433			MBE	0.921749	0.728,1.167	0.497717
		Contamination Mixture	0.791329	0.716,1.0161	0.098827			Contamination Mixture	0.797874	0.715,0.927	0.00960864
		RAPS	0.958545	0.8904,1.032	0.261			RAPS	0.982028	0.905,1.066	0.664
Fasting glucose	28	Weighted median	0.774589	0.5961,1.0065	0.0559375	Fasting glucose	15	Weighted median	0.754299	0.563,1.011	0.0590641
		IVW	0.815065	0.6762,0.9824	0.031843			IVW	0.724955	0.582,0.903	0.00409133
		MR-Egger	0.663649	0.4585,0.9606	0.0297963			MR-Egger	0.859031	0.507,1.456	0.57246
		(intercept)	0.0113771	-0.0063,0.0291	0.207043			(intercept)	-0.0103526	-0.04,0.019	0.488165
		MBE	0.776873	0.5845,1.0326	0.0820387			MBE	0.771146	0.56,1.062	0.111958
		Contamination Mixture	0.721656	0.5908,0.9083	0.00659945			Contamination Mixture	0.693359	0.545,0.899	0.00680671
		RAPS	0.813171	0.672,0.9839	0.0335			RAPS	0.72297	0.578,0.904	0.00439
P<5E-5, R2<0.1						P<5E-6, R2<0.1
Exposures	Instrumental SNPs	Methods	OR	95%CI	P	Exposures	Instrumental SNPs	Methods	OR	95%CI	P
Fasting insulin	152	Weighted median	1.20677	0.987,1.476	0.0671026	Fasting insulin	24	Weighted median	0.699985	0.447,1.097	0.119766
		IVW	1.07826	0.942,1.235	0.275554			IVW	0.730587	0.534,0.999	0.0493826
		MR-Egger	1.22085	0.981,1.52	0.0740936			MR-Egger	0.890357	0.516,1.537	0.676586
		(intercept)	-0.00602143	-0.014,0.002	0.157997			(intercept)	-0.00940943	-0.031,0.012	0.384528
		MBE	1.19729	0.792,1.809	0.392624			MBE	0.764302	0.356,1.641	0.490415
		Contamination Mixture	1.08329	0.961,1.234	0.17759			Contamination Mixture	0.460466	0.248,0.909	0.0297975
		RAPS	1.08323	0.949,1.236	0.235			RAPS	0.719174	0.524,0.986	0.0407

## Sheet: Supplementary Table 3
Table S3: Plink clumping using R2<0.001, forward mendelian randomization results for the causal effect of lipid and glucose metabolism on SUI in female
Forward Mendelian randomization analysis
P<5E-8, R2<0.001						P<5E-10, R2<0.001
Exposures	Instrumental SNPs	Methods	OR	95%CI	P	Exposures	Instrumental SNPs	Methods	OR	95%CI	P
Total cholesterol	59	Weighted median	1.12347	0.994,1.269	0.0616692	Total cholesterol	45	Weighted median	1.12224	0.99,1.272	0.0709689
		IVW	1.08681	0.991,1.192	0.0766151			IVW	1.0941	0.999,1.198	0.0517702
		MR-Egger	1.11055	0.948,1.301	0.193659			MR-Egger	1.11556	0.953,1.305	0.172437
		(intercept)	-0.0023063	-0.016,0.011	0.740688			(intercept)	-0.00224076	-0.017,0.012	0.765507
		MBE	1.12686	0.998,1.272	0.0540333			MBE	1.12838	0.998,1.276	0.054407
		Contamination Mixture	1.07708	1.004,1.202	0.0674858			Contamination Mixture	1.12162	1.005,1.252	0.0528489
		RAPS	1.08803	1.008,1.175	0.0306			RAPS	1.09505	1.011,1.186	0.0253
Low-density lipoproteins	53	Weighted median	1.08959	0.981,1.21	0.109216	Low-density lipoproteins	41	Weighted median	1.08987	0.982,1.209	0.104673
		IVW	1.04603	0.974,1.124	0.218627			IVW	1.05587	0.984,1.132	0.128175
		MR-Egger	1.11629	1.009,1.234	0.0321656			MR-Egger	1.12467	1.017,1.244	0.0225104
		(intercept)	-0.00915361	-0.019,0.001	0.0769789			(intercept)	-0.00988196	-0.021,0.001	0.0886443
		MBE	1.08848	0.989,1.198	0.084018			MBE	1.08768	0.988,1.197	0.0855324
		Contamination Mixture	1.07293	1,1.151	0.0633627			Contamination Mixture	1.07293	1,1.162	0.0607743
		RAPS	1.04639	0.977,1.121	0.196			RAPS	1.05619	0.984,1.133	0.128
High-density lipoproteins	56	Weighted median	1.18867	1.031,1.37	0.0169395	High-density lipoproteins	33	Weighted median	1.19129	1.035,1.371	0.0148257
		IVW	1.09902	1.005,1.202	0.0386079			IVW	1.09026	0.971,1.225	0.144815
		MR-Egger	1.10792	0.946,1.298	0.205027			MR-Egger	1.14694	0.917,1.435	0.230362
		(intercept)	-0.000791577	-0.014,0.012	0.903399			(intercept)	-0.00604474	-0.029,0.017	0.602511
		MBE	1.22257	1.061,1.408	0.00534581			MBE	1.22851	1.065,1.417	0.00476642
		Contamination Mixture	1.18929	1.087,1.288	0.00049891			Contamination Mixture	1.22551	1.065,1.368	0.00243728
		RAPS	1.10032	1.011,1.198	0.0272			RAPS	1.09143	0.996,1.196	0.0612
Triglycerides	35	Weighted median	0.934092	0.794,1.099	0.410143	Triglycerides	25	Weighted median	0.950838	0.805,1.124	0.553781
		IVW	0.944862	0.834,1.071	0.374662			IVW	0.965049	0.86,1.083	0.545725
		MR-Egger	1.06117	0.839,1.342	0.620052			MR-Egger	0.996532	0.792,1.254	0.976336
		(intercept)	-0.0105353	-0.029,0.008	0.252565			(intercept)	-0.00313213	-0.022,0.016	0.749598
		MBE	0.946915	0.768,1.168	0.609837			MBE	0.981786	0.778,1.238	0.876656
		Contamination Mixture	0.798576	0.667,1.067	0.168407			Contamination Mixture	0.787575	0.664,1.042	0.110688
		RAPS	0.943999	0.854,1.043	0.257			RAPS	0.964725	0.868,1.072	0.503
Fasting glucose	17	Weighted median	0.776026	0.577,1.044	0.0941842	Fasting glucose	8	Weighted median	0.761666	0.548,1.059	0.105145
		IVW	0.864967	0.674,1.11	0.254803			IVW	0.754319	0.558,1.02	0.0674447
		MR-Egger	0.69939	0.444,1.102	0.123034			MR-Egger	0.919218	0.442,1.914	0.821863
		(intercept)	0.0117773	-0.009,0.033	0.273951			(intercept)	-0.0118224	-0.051,0.028	0.557709
		MBE	0.778826	0.584,1.038	0.0885126			MBE	0.769425	0.547,1.082	0.132012
		Contamination Mixture	0.736234	0.579,1.055	0.0972104			Contamination Mixture	0.707366	0.545,1.014	0.0683043
		RAPS	0.863444	0.687,1.085	0.208			RAPS	0.752549	0.574,0.986	0.0392
P<5E-5, R2<0.001						P<5E-6, R2<0.001
Exposures	Instrumental SNPs	Methods	OR	95%CI	P	Exposures	Instrumental SNPs	Methods	OR	95%CI	P
Fasting insulin	143	Weighted median	1.21597	0.992,1.491	0.0601533	Fasting insulin	24	Weighted median	0.699985	0.447,1.097	0.119766
		IVW	1.09235	0.951,1.254	0.210417			IVW	0.730587	0.534,0.999	0.0493826
		MR-Egger	1.20283	0.963,1.502	0.103537			MR-Egger	0.890357	0.516,1.537	0.676586
		(intercept)	-0.00472987	-0.013,0.004	0.278397			(intercept)	-0.00940943	-0.031,0.012	0.384528
		MBE	1.15672	0.761,1.759	0.495859			MBE	0.764302	0.356,1.641	0.490415
		Contamination Mixture	1.10517	0.97,1.246	0.12483			Contamination Mixture	0.460466	0.248,0.909	0.0297975
		RAPS	1.09818	0.96,1.256	0.172			RAPS	0.719174	0.524,0.986	0.0407

## Sheet: Supplementary Table 4
Table S4: MR-PRESSO of forward mendelian randomization testing casusal effect of lipid and glucose metabolism on SUI in female
Exposure: Total cholesterol
P<5E-8, R2<0.1, N=151
MR Analysis	Causal Estimate	Sd	T-stat	P-value	global test RSSobs	global test p-value	distortion coefficient	distortion test p-value
Raw	0.110814	0.0298546	3.71178	0.000289468	191.414	0.0172185
Outlier-corrected	NA	NA	NA	NA
P<5E-10, R2<0.1, N=99
MR Analysis	Causal Estimate	Sd	T-stat	P-value	global test RSSobs	global test p-value	distortion coefficient	distortion test p-value
Raw	0.127084	0.0284661	4.46441	2.14953e-05	98.5111	0.521212
Outlier-corrected	NA	NA	NA	NA	98.5111	0.521212
P<5E-8, R2<0.001, N=59
MR Analysis	Causal Estimate	Sd	T-stat	P-value	global test RSSobs	global test p-value	distortion coefficient	distortion test p-value
Raw	0.0832484	0.0470151	1.77067	0.0818699	87.4606	0.0135593
Outlier-corrected	NA	NA	NA	NA
P<5E-10, R2<0.001, N=45
MR Analysis	Causal Estimate	Sd	T-stat	P-value	global test RSSobs	global test p-value	distortion coefficient	distortion test p-value
Raw	0.0899304	0.0462358	1.94504	0.058178	59.685	0.0866667
Outlier-corrected	NA	NA	NA	NA
Exposure: Low-density lipoproteins
P<5E-8, R2<0.1, N=149
MR Analysis	Causal Estimate	Sd	T-stat	P-value	global test RSSobs	global test p-value	distortion coefficient	distortion test p-value
Raw	0.0839757	0.0236977	3.54363	0.000528438	157.486	0.307383
Outlier-corrected	NA	NA	NA	NA
P<5E-10, R2<0.1, N=112
MR Analysis	Causal Estimate	Sd	T-stat	P-value	global test RSSobs	global test p-value	distortion coefficient	distortion test p-value
Raw	0.0885968	0.023156	3.82608	0.000215637	104.759	0.7
Outlier-corrected	NA	NA	NA	NA	104.759	0.7
P<5E-8, R2<0.001, N=53
MR Analysis	Causal Estimate	Sd	T-stat	P-value	global test RSSobs	global test p-value	distortion coefficient	distortion test p-value
Raw	0.0450051	0.0365839	1.23019	0.224163	59.2801	0.286793
Outlier-corrected	NA	NA	NA	NA
P<5E-10, R2<0.001, N=41
MR Analysis	Causal Estimate	Sd	T-stat	P-value	global test RSSobs	global test p-value	distortion coefficient	distortion test p-value
Raw	0.0543604	0.0356686	1.52404	0.135367	41.3779	0.482927
Outlier-corrected	NA	NA	NA	NA
Exposure: High-density lipoproteins
P<5E-8, R2<0.1, N=133
MR Analysis	Causal Estimate	Sd	T-stat	P-value	global test RSSobs	global test p-value	distortion coefficient	distortion test p-value
Raw	0.0879159	0.0292417	3.00653	0.00316419	135.79	0.439098
Outlier-corrected	NA	NA	NA	NA
P<5E-10, R2<0.1, N=87
MR Analysis	Causal Estimate	Sd	T-stat	P-value	global test RSSobs	global test p-value	distortion coefficient	distortion test p-value
Raw	0.0855311	0.0353837	2.41724	0.0177512	111.547	0.0574713
Outlier-corrected	NA	NA	NA	NA	111.547	0.0574713
P<5E-8, R2<0.001, N=56
MR Analysis	Causal Estimate	Sd	T-stat	P-value	global test RSSobs	global test p-value	distortion coefficient	distortion test p-value
Raw	0.0944221	0.0456511	2.06834	0.0433227	65.5006	0.217857
Outlier-corrected	NA	NA	NA	NA
P<5E-10, R2<0.001, N=33
MR Analysis	Causal Estimate	Sd	T-stat	P-value	global test RSSobs	global test p-value	distortion coefficient	distortion test p-value
Raw	0.0864171	0.0592672	1.45809	0.15456	55.7948	0.0181818	-18.967	0.742424
Outlier-corrected	0.106644	0.054807	1.94582	0.0607918
Pleiotropy coefficients per SNP
ID	1	2	3	4	5	6	7	8	9	10	11	12	13	14	15	16	17	18	19	20	21	22	23	24	25	26	27	28	29	30	31	32	33
RSSobs	0.000822185	0.00344565	4.55739e-05	0.000594006	0.00107447	0.00262725	1.92788e-05	0.000949409	0.00250416	0.000301859	0.000247212	4.43299e-07	0.000355034	0.000539805	0.00431223	0.000206113	0.00171833	4.84197e-05	0.000107388	0.000103276	0.000884968	7.65457e-06	0.000429275	0.00622067	0.000123303	0.0545021	0.00164764	0.000184909	0.00209121	0.03498	0.00148381	6.61796e-05	0.00045775
Pvalue	1	1	1	1	1	1	1	1	0.2	1	1	1	1	1	0.2	1	1	1	1	1	1	1	1	0.3	1	<0.1	1	1	1	0.6	1	1	1
Exposure: Triglycerides
P<5E-8, R2<0.1, N=93
MR Analysis	Causal Estimate	Sd	T-stat	P-value	global test RSSobs	global test p-value	distortion coefficient	distortion test p-value
Raw	-0.0576672	0.0414926	-1.38982	0.167975	115.211	0.0554348
Outlier-corrected	NA	NA	NA	NA
P<5E-10, R2<0.1, N=56
MR Analysis	Causal Estimate	Sd	T-stat	P-value	global test RSSobs	global test p-value	distortion coefficient	distortion test p-value
Raw	-0.0178844	0.0488454	-0.366143	0.715663	80.1394	0.025	52.4613	0.805357
Outlier-corrected	-0.0376207	0.0439135	-0.856699	0.395397
Pleiotropy coefficients per SNP
ID	1	2	3	4	5	6	7	8	9	10	11	12	13	14	15	16	17	18	19	20	21	22	23	24	25	26	27	28	29	30	31	32	33	34	35	36	37	38	39	40	41	42	43	44	45	46	47	48	49
RSSobs	7.23523e-07	0.000483243	0.00010122	9.05764e-06	0.000299135	5.46484e-05	0.00153659	0.000929973	0.000117189	0.000467686	0.000102077	0.00494286	7.42631e-05	8.36264e-05	0.000359403	0.00214735	0.00196984	6.20631e-05	0.00743326	0.035949	0.00811136	0.00151273	0.00276607	0.000642892	0.0022702	3.77871e-05	0.00926331	0.000504753	1.24583e-06	0.00937973	0.00012382	0.000165728	0.000107723	0.000124449	0.000123403	0.000762016	1.70056e-05	5.39025e-06	0.000668421	2.05385e-05	0.00140689	0.00630258	0.000143654	0.000676781	0.000362814	2.35625e-05	0.000480439	1.06952e-05	0.000987604
Pvalue	1	1	1	1	1	1	1	1	1	1	1	0.7	1	1	1	1	1	1	<0.1	1	1	1	1	1	1	1	1	1	1	1	1	1	1	1	1	1	1	1	1	1	1	0.3	1	1	1	1	1	1	1
P<5E-8, R2<0.001, N=35
MR Analysis	Causal Estimate	Sd	T-stat	P-value	global test RSSobs	global test p-value	distortion coefficient	distortion test p-value
Raw	-0.0645958	0.0641063	-1.00764	0.320747	58.5544	0.02	-28.5102	0.774286
Outlier-corrected	-0.0502651	0.0607729	-0.827098	0.414123
Pleiotropy coefficients per SNP
ID	1	2	3	4	5	6	7	8	9	10	11	12	13	14	15	16	17	18	19	20	21	22	23	24	25	26	27	28	29	30	31	32	33	34	35
RSSobs	5.36395e-05	2.34028e-05	0.000223493	0.000164711	0.00400057	0.000107666	0.00276864	0.0027104	0.00238739	3.55957e-05	0.00256573	1.87376e-05	0.0147129	0.00042918	0.00282512	0.000219006	7.37823e-05	7.36229e-05	0.00141354	7.22677e-05	0.00107417	4.49809e-08	7.32734e-06	0.00121555	0.000311801	0.000254309	0.000426388	0.000697704	0.00207125	0.000899023	0.00255556	0.00176487	3.33973e-05	0.00119601	0.000390979
Pvalue	1	1	1	1	1	1	0.3	<0.1	1	1	0.8	1	1	1	0.6	1	1	1	1	1	1	1	1	1	1	1	1	1	1	1	1	1	1	1	1
P<5E-10, R2<0.001, N=25
MR Analysis	Causal Estimate	Sd	T-stat	P-value	global test RSSobs	global test p-value	distortion coefficient	distortion test p-value
Raw	-0.0355761	0.0588834	-0.604179	0.551394	33.3484	0.16
Outlier-corrected	NA	NA	NA	NA
Exposure: Fasting glucose
P<5E-8, R2<0.1, N=28
MR Analysis	Causal Estimate	Sd	T-stat	P-value	global test RSSobs	global test p-value	distortion coefficient	distortion test p-value
Raw	-0.204487	0.0909798	-2.24761	0.0329728	25.7211	0.625
Outlier-corrected	NA	NA	NA	NA
P<5E-10, R2<0.1, N=15
MR Analysis	Causal Estimate	Sd	T-stat	P-value	global test RSSobs	global test p-value	distortion coefficient	distortion test p-value
Raw	-0.321646	0.102457	-3.13931	0.00724393	12.6193	0.68
Outlier-corrected	NA	NA	NA	NA
P<5E-8, R2<0.001, N=17
MR Analysis	Causal Estimate	Sd	T-stat	P-value	global test RSSobs	global test p-value	distortion coefficient	distortion test p-value
Raw	-0.145064	0.127388	-1.13876	0.271567	21.1577	0.282353
Outlier-corrected	NA	NA	NA	NA
P<5E-10, R2<0.001, N=8
MR Analysis	Causal Estimate	Sd	T-stat	P-value	global test RSSobs	global test p-value	distortion coefficient	distortion test p-value
Raw	-0.0355761	0.0588834	-0.604179	0.551394	33.3484	0.16
Outlier-corrected	NA	NA	NA	NA
Exposure: Fasting insulin
P<5E-5, R2<0.1, N=152
MR Analysis	Causal Estimate	Sd	T-stat	P-value	global test RSSobs	global test p-value	distortion coefficient	distortion test p-value
Raw	0.0753474	0.0691031	1.09036	0.277291	178.633	0.0690789
Outlier-corrected	NA	NA	NA	NA
P<5E-6, R2<0.1, N=24
MR Analysis	Causal Estimate	Sd	T-stat	P-value	global test RSSobs	global test p-value	distortion coefficient	distortion test p-value
Raw	-0.313907	0.159727	-1.96527	0.0615719	27.3796	0.325
Outlier-corrected	NA	NA	NA	NA
P<5E-5, R2<0.001, N=143
MR Analysis	Causal Estimate	Sd	T-stat	P-value	global test RSSobs	global test p-value	distortion coefficient	distortion test p-value
Raw	0.0385828	0.0116286	3.31793	0.00115769	150.356	0.287143
Outlier-corrected	NA	NA	NA	NA
P<5E-6, R2<0.001, N=24
MR Analysis	Causal Estimate	Sd	T-stat	P-value	global test RSSobs	global test p-value	distortion coefficient	distortion test p-value
Raw	0.0559717	0.0275983	2.02808	0.0560819	25.4086	0.238095
Outlier-corrected	NA	NA	NA	NA
[truncated: 7 more columns]

## Sheet: Supplementary Table 5
Table S5: Plink clumping using R2<0.1, reserse mendelian randomization results for the causal effect of SUI in female on lipid and glucose metabolism
Reverse Mendelian randomization analysis
P<5E-5, R2<0.1						P<5E-6, R2<0.1
Outcomes	Instrumental SNPs	Methods	BETA	95%CI	P	Outcomes	Instrumental SNPs	Methods	BETA	95%CI	P
Total cholesterol	133	Weighted median	0.0163684	-0.00437,0.0371	0.121932	Total cholesterol	20	Weighted median	-0.00584816	-0.0519,0.0402	0.803591
		IVW	0.00693323	-0.00715,0.021	0.334648			IVW	0.0046379	-0.0324,0.0417	0.80634
		MR-Egger	0.0236476	-0.00876,0.0561	0.152628			MR-Egger	0.0164887	-0.0899,0.123	0.76134
		(intercept)	-0.00230637	-0.00633,0.00172	0.261752			(intercept)	-0.00163574	-0.0154,0.0121	0.815189
		MBE	0.0126272	-0.0353,0.0606	0.605705			MBE	-0.0133999	-0.113,0.0858	0.791264
		Contamination Mixture	0.0235217	-0.00648,0.0435	0.307447			Contamination Mixture	-0.0033	-0.0533,0.0667	0.744056
		RAPS	0.00737626	-0.00684,0.0216	0.309			RAPS	0.00496826	-0.0261,0.036	0.754
Low-density lipoproteins	132	Weighted median	0.00811359	-0.0127,0.0289	0.423605	Low-density lipoproteins	20	Weighted median	0.00810851	-0.0357,0.0519	0.716908
		IVW	0.000973792	-0.013,0.0149	0.518957			IVW	0.00200504	-0.0289,0.0329	0.898786
		MR-Egger	0.022443	-0.0095,0.0544	0.163707			MR-Egger	0.0263389	-0.06,0.113	0.550061
		(intercept)	-0.00296663	-0.00694,0.00101	0.21702			(intercept)	-0.00336023	-0.0145,0.00778	0.554324
		MBE	0.0173659	-0.0296,0.0644	0.712553			MBE	0.00916607	-0.0707,0.0891	0.822133
		Contamination Mixture	0.0168261	-0.00317,0.0268	0.597372			Contamination Mixture	0.00535333	-0.0446,0.0354	0.760493
		RAPS	0.00103152	-0.0135,0.0156	0.509			RAPS	0.00208914	-0.0301,0.0343	0.899
High-density lipoproteins	131	Weighted median	0.00688487	-0.0143,0.0281	0.524185	High-density lipoproteins	20	Weighted median	-0.0179961	-0.0622,0.0262	0.424806
		IVW	0.0133316	-0.00166,0.0283	0.0814145			IVW	-0.0141906	-0.0467,0.0184	0.392852
		MR-Egger	-0.0102247	-0.0446,0.0241	0.559843			MR-Egger	0.0292342	-0.0616,0.12	0.528031
		(intercept)	0.00324762	-0.00102,0.00752	0.13593			(intercept)	-0.00600287	-0.0177,0.00572	0.315371
		MBE	-0.00626548	-0.0535,0.0409	0.794793			MBE	-0.0202131	-0.0924,0.052	0.58303
		Contamination Mixture	0.00469565	-0.0253,0.0247	1			Contamination Mixture	-0.0421725	-0.0922,0.0578	0.854834
		RAPS	0.0142475	-0.00017,0.0287	0.0528			RAPS	-0.0148602	-0.0467,0.017	0.36
Triglycerides	131	Weighted median	-0.0140064	-0.0349,0.0069	0.189242	Triglycerides	20	Weighted median	0.00980171	-0.0347,0.0543	0.665884
		IVW	-0.00438347	-0.0215,0.0127	0.615797			IVW	0.0224816	-0.0309,0.0759	0.4094
		MR-Egger	0.00986929	-0.0294,0.0491	0.621948			MR-Egger	-0.0546046	-0.203,0.094	0.471515
		(intercept)	-0.00197456	-0.00686,0.00291	0.42851			(intercept)	0.0106465	-0.00852,0.0298	0.276402
		MBE	-0.0201808	-0.0627,0.0224	0.352625			MBE	0.0194544	-0.0519,0.0908	0.592918
		Contamination Mixture	-0.018913	-0.0389,0.00109	0.15556			Contamination Mixture	0.01108	-0.0389,0.0411	0.744472
		RAPS	-0.0048108	-0.019,0.00935	0.506			RAPS	0.0260623	-0.00431,0.0564	0.0926
Fasting glucose	129	Weighted median	-0.00737456	-0.0216,0.00686	0.309846	Fasting glucose	19	Weighted median	0.018865	-0.0113,0.0491	0.220729
		IVW	-0.00300706	-0.0127,0.00668	0.542816			IVW	0.00716395	-0.0142,0.0286	0.511873
		MR-Egger	0.0199595	-0.00273,0.0426	0.0846896			MR-Egger	0.00137768	-0.0595,0.0622	0.96461
		(intercept)	-0.0031348	-0.00594,-0.000334	0.0282558			(intercept)	0.000784852	-0.00694,0.00851	0.842203
		MBE	-0.00890325	-0.0378,0.02	0.545436			MBE	0.0185718	-0.0315,0.0686	0.467022
		Contamination Mixture	-0.00434783	-0.0143,0.00565	0.504833			Contamination Mixture	0.025	-0.015,0.045	0.151066
		RAPS	-0.00315448	-0.0134,0.00711	0.547			RAPS	0.00742747	-0.015,0.0298	0.516
Fasting insulin	126	Weighted median	0.999606	0.985,1.015	0.959021	Fasting insulin	19	Weighted median	1.02201	0.99,1.055	0.181851
		IVW	0.997846	0.988,1.008	0.680231		20	IVW	1.01026	0.986,1.036	0.419823
		MR-Egger	1.01896	0.995,1.043	0.118326			MR-Egger	1.02131	0.949,1.099	0.572806
		(intercept)	-0.00286432	-0.006,0	0.0537241			(intercept)	-0.00146831	-0.011,0.008	0.756304
		MBE	1.00964	0.978,1.042	0.548773			MBE	1.03214	0.983,1.084	0.207616
		Contamination Mixture	0.995662	0.986,1.016	1			Contamination Mixture	1.01765	0.998,1.059	0.183496
		RAPS	0.997722	0.987,1.008	0.672			RAPS	1.01066	0.987,1.035	0.384

## Sheet: Supplementary Table 6
Table S6: MR-PRESSO of reserse mendelian randomization testing casusal effect of SUI in female on lipid and glucose metabolism
Outcome: Total cholesterol
P<5E-5, R2<0.1, N=133
MR Analysis	Causal Estimate	Sd	T-stat	P-value	global test RSSobs	global test p-value	distortion coefficient	distortion test p-value
Raw	0.00435848	0.00675781	0.644954	0.520076	138.4	0.372932
Outlier-corrected	NA	NA	NA	NA
P<5E-6, R2<0.1, N=20
MR Analysis	Causal Estimate	Sd	T-stat	P-value	global test RSSobs	global test p-value	distortion coefficient	distortion test p-value
Raw	0.0046379	0.0189185	0.245151	0.808968	32.6404	0.09
Outlier-corrected	NA	NA	NA	NA
Outcome: Low-density lipoproteins
P<5E-5, R2<0.1, N=132
MR Analysis	Causal Estimate	Sd	T-stat	P-value	global test RSSobs	global test p-value	distortion coefficient	distortion test p-value
Raw	-0.0015166	0.00677624	-0.223811	0.823253	131.656	0.509849
Outlier-corrected	NA	NA	NA	NA
P<5E-6, R2<0.1, N=20
MR Analysis	Causal Estimate	Sd	T-stat	P-value	global test RSSobs	global test p-value	distortion coefficient	distortion test p-value
Raw	0.00200504	0.0153131	0.130936	0.897202	20.6325	0.555
Outlier-corrected	NA	NA	NA	NA
Outcome: High-density lipoproteins
P<5E-5, R2<0.1, N=131
MR Analysis	Causal Estimate	Sd	T-stat	P-value	global test RSSobs	global test p-value	distortion coefficient	distortion test p-value
Raw	0.012343	0.00728881	1.69342	0.0927696	153.7	0.106107
Outlier-corrected	NA	NA	NA	NA
P<5E-6, R2<0.1, N=20
MR Analysis	Causal Estimate	Sd	T-stat	P-value	global test RSSobs	global test p-value	distortion coefficient	distortion test p-value
Raw	-0.0141906	0.0166078	-0.854457	0.403497	23.8555	0.315
Outlier-corrected	NA	NA	NA	NA
Outcome: Triglycerides
P<5E-5, R2<0.1, N=131
MR Analysis	Causal Estimate	Sd	T-stat	P-value	global test RSSobs	global test p-value	distortion coefficient	distortion test p-value
Raw	-0.00542478	0.0083889	-0.646662	0.518991	204.668	<0.001	49.9896	0.648092
Outlier-corrected	-0.0108473	0.00736875	-1.47207	0.143438
Pleiotropy coefficients per SNP
ID	1	2	3	4	5	6	7	8	9	10	11	12	13	14	15	16	17	18	19	20	21	22	23	24	25	26	27	28	29	30	31	32	33	34	35	36	37	38	39	40	41	42	43	44	45	46	47	48	49
RSSobs	0.000232992	8.03305e-06	1.27854e-05	1.22091e-05	8.25379e-05	3.3589e-06	0.000337119	0.00010112	1.24584e-05	7.5597e-05	0.000361861	5.57467e-05	0.000773323	0.00257017	0.00663134	0.00163562	0.00111969	2.69667e-05	2.14702e-05	2.46946e-05	4.27173e-06	0.00294155	0.000715598	0.00125916	0.00054532	3.16927e-06	0.000118119	7.11344e-05	2.59625e-06	9.32936e-05	9.74538e-06	1.85079e-05	1.7503e-05	0.000299747	2.41279e-05	0.00414939	0.00774816	6.06168e-06	0.00154747	0.000505665	0.00260118	0.000155005	0.00859539	0.000233568	0.00124233	0.000298958	0.000497567	3.11327e-05	1.27891e-05
Pvalue	1	1	1	1	1	1	0.6	1	1	1	1	1	1	1	1	1	1	1	1	1	1	1	1	1	1	1	1	1	1	1	1	1	1	1	1	1	1	1	1	1	1	1	1	1	1	1	1	1	1
P<5E-6, R2<0.1, N=20
MR Analysis	Causal Estimate	Sd	T-stat	P-value	global test RSSobs	global test p-value	distortion coefficient	distortion test p-value
Raw	0.0224816	0.0272521	0.82495	0.419637	66.1453	<0.005	460.779	0.055
Outlier-corrected	-0.00623142	0.0135551	-0.459711	0.651228
Pleiotropy coefficients per SNP
ID	1	2	3	4	5	6	7	8	9	10	11	12	13	14	15	16	17	18	19	20
RSSobs	4.55612e-05	6.43867e-07	0.00206226	6.55979e-05	5.73514e-07	4.90788e-05	0.000106667	0.00264365	0.000497157	5.7805e-05	8.37021e-05	0.00245597	1.38268e-05	4.99965e-08	9.01457e-06	0.000108386	5.16274e-05	9.05767e-06	0.00075389	1.10101e-05
Pvalue	1	1	1	1	1	1	1	0.7	0.6	1	1	<0.1	1	1	1	1	1	1	1	1
Outcome: Fasting glucose
P<5E-5, R2<0.1, N=129
MR Analysis	Causal Estimate	Sd	T-stat	P-value	global test RSSobs	global test p-value	distortion coefficient	distortion test p-value
Raw	-0.00159577	0.00473227	-0.337209	0.736511	127.783	0.546512
Outlier-corrected	NA	NA	NA	NA
P<5E-6, R2<0.1, N=19
MR Analysis	Causal Estimate	Sd	T-stat	P-value	global test RSSobs	global test p-value	distortion coefficient	distortion test p-value
Raw	0.00716395	0.0104486	0.685637	0.501678	18.4446	0.552632
Outlier-corrected	NA	NA	NA	NA
Outcome: Type 2 diabetes
P<5E-5, R2<0.1, N=126
MR Analysis	Causal Estimate	Sd	T-stat	P-value	global test RSSobs	global test p-value	distortion coefficient	distortion test p-value
Raw	-0.00215647	0.00523228	-0.412148	0.680937	133.408	0.33254
Outlier-corrected	NA	NA	NA	NA
P<5E-6, R2<0.1, N=19
MR Analysis	Causal Estimate	Sd	T-stat	P-value	global test RSSobs	global test p-value	distortion coefficient	distortion test p-value
Raw	0.0102042	0.0126489	0.806729	0.430354	23.1607	0.357895
Outlier-corrected	NA	NA	NA	NA
[truncated: 82 more columns]
